# Supplementary material
Source: PubMed Central journal article supplement (PMC4164116)
Supplement: NIHMS493090-supplement-Supplemental_Table_1.pdf [file NIHMS493090-supplement-Supplemental_Table_1.pdf]

**Supplemental Table 1. Participating studies**

| Study<br>Acronym                       | Study Name<br>[Reference]                                   | Country     | Recruitment base                                                                                                                                                                                                                                                                                                                                                                                                                                              |                                                                                                                                                                                       |
|----------------------------------------|-------------------------------------------------------------|-------------|---------------------------------------------------------------------------------------------------------------------------------------------------------------------------------------------------------------------------------------------------------------------------------------------------------------------------------------------------------------------------------------------------------------------------------------------------------------|---------------------------------------------------------------------------------------------------------------------------------------------------------------------------------------|
|                                        |                                                             |             | Cases                                                                                                                                                                                                                                                                                                                                                                                                                                                         | Controls                                                                                                                                                                              |
| <b>STUDIES OF WHITE EUROPEAN WOMEN</b> |                                                             |             |                                                                                                                                                                                                                                                                                                                                                                                                                                                               |                                                                                                                                                                                       |
| ABCFS                                  | Australian Breast Cancer Family Study [1]                   | Australia   | Cancer registries in Victoria and New South Wales (1992-1999): all cases from Melbourne and Sydney diagnosed before age 40 plus a random sample of those diagnosed at ages 40-59                                                                                                                                                                                                                                                                              | Identified between 1992-1999 from the electoral rolls in Melbourne and Sydney (enrolling to vote is compulsory); frequency matched to cases by age in-5 year categories               |
| ABCS                                   | Amsterdam Breast Cancer Study [2]                           | Netherlands | All cases aged <50 and diagnosed from 1974-1994 in 4 Dutch hospitals.                                                                                                                                                                                                                                                                                                                                                                                         | Randomly selected women from population-based prospective cohort studies, aged <50 at baseline (1987-1991 and 1993-1997) and from the same areas as cases.                            |
| BBCC                                   | Bavarian Breast Cancer Cases and Controls [3]               | Germany     | Consecutive, unselected cases with invasive breast cancer recruited at the University Breast Centre, Franconia in Northern Bavaria from 2002-2006                                                                                                                                                                                                                                                                                                             | Healthy women aged 55 or older with no diagnosis of cancer. Invited by a newspaper advertisement in Northern Bavaria between 2002-2006                                                |
| BBCS                                   | British Breast Cancer Study [4]                             | U.K.        | (i) English & Scottish Cancer Registries: all breast cancer cases who developed a first primary before age 66 in 1971 or later and who subsequently developed a second primary cancer<br>(ii) Breast Cancer Clinics: all breast cancer cases who developed a first primary before age 71 in 1967 or later and who either subsequently developed a second primary or had at least two affected female first-degree relatives.<br>All recruited from 2001-2008. | A friend, sister-in-law, daughter-in-law or other non-blood relative of cases, recruited from 2001-2008                                                                               |
| BIGGS                                  | Breast Cancer in Galway Genetic Study [5]                   | Ireland     | Unselected cases recruited from University College Hospital Galway and surrounding hospitals in the West of Ireland since 2001                                                                                                                                                                                                                                                                                                                                | Women > 60 years with no personal history of any cancer and no family history of breast or ovarian cancer identified from retirement groups in the West of Ireland between 2001-2008. |
| BSUCH                                  | Breast Cancer Study of the University Clinic Heidelberg [6] | Germany     | All cases diagnosed with breast cancer in 2007-2009 at the University Women's Clinic Heidelberg                                                                                                                                                                                                                                                                                                                                                               | Female blood donors recruited in 2007-2009 at the Institute of Transfusion Medicine & Immunology, Mannheim.                                                                           |

|          |                                                                  |         |                                                                                                                                                                                                                                                                                              |                                                                                                                                                                                                                                                    |
|----------|------------------------------------------------------------------|---------|----------------------------------------------------------------------------------------------------------------------------------------------------------------------------------------------------------------------------------------------------------------------------------------------|----------------------------------------------------------------------------------------------------------------------------------------------------------------------------------------------------------------------------------------------------|
| CGPS     | Copenhagen General Population Study [7]                          | Denmark | Consecutive, incident cases from one hospital with centralized care for a population of 400,000 women in Copenhagen (2001-present)                                                                                                                                                           | Women with no history of breast cancer residing in the same region as cases identified from the Copenhagen General Population Study (2003-2007)                                                                                                    |
| CNIO-BCS | Spanish National Cancer Centre Breast Cancer Study [8]           | Spain   | (i) consecutive breast cancer patients from three public hospitals, two in Madrid and one in Oviedo; (ii) cases with at least one affected first degree relative recruited through the CNIO family cancer clinic in Madrid (2000-2005)                                                       | Women attending the Menopause Research Centre, Madrid and female members of the College of Lawyers attending a free, targeted medical check-up in Madrid, all free of breast cancer and all in Madrid between 2000-2005                            |
| ESTHER   | ESTHER Breast Cancer Study [9]                                   | Germany | Breast cancer cases in all hospitals in the state of Saarland, from 2001-2003 (ESTHER) and 1996-1998 (VERDI)                                                                                                                                                                                 | Random sample of women a routine health check-up in Saarland, in 2000-2002; frequency matched to cases by age in-5 year categories                                                                                                                 |
| FBCS     | ICR Familial Breast Cancer Study [10]                            | U.K.    | Index patients with breast cancer and at least 2 relatives affected with breast cancer, recruited throughout the UK in 1995-2005                                                                                                                                                             | Selected from the 1958 Birth Cohort Collection                                                                                                                                                                                                     |
| GC-HBOC  | German Familial Breast Cancer Study [11]                         | Germany | Index patients from German breast cancer families; BRCA1/2 mutation free, collected 1996-2007 via Institute of Human Genetics, University Heidelberg Department of Gynaecology & Obstetrics, Cologne & Department of Gynaecology and Obstetrics at the Ludwig-Maximilians-University, Munich | Female blood donors recruited in 2004 & 2007 at the Institute of Transfusion Medicine & Immunology, Mannheim.                                                                                                                                      |
| GENICA   | Gene Environment Interaction & Breast Cancer in Germany [12, 13] | Germany | Incident breast cancer cases enrolled at hospitals in the Greater Bonn area between 2000-2004                                                                                                                                                                                                | Random address sample selected in 2001-2004 from 31 population registries in the greater Bonn area; frequency matched to cases on year of birth in 5-year categories                                                                               |
| GESBC    | Genetic Epidemiology Study of Breast Cancer by Age 50 [14]       | Germany | Incident cases diagnosed before age 50 years at all clinics in two regions: Rhein-Neckar-Odenwald and Freiburg                                                                                                                                                                               | Randomly selected from population registries covering the same regions; matched by age and region.                                                                                                                                                 |
| HABCS    | Hannover Breast Cancer Study [15]                                | Germany | Cases who received radiotherapy for breast cancer at Hannover Medical School between 1997-2003                                                                                                                                                                                               | Female blood bank donors at Hannover Medical School, collected in 2005                                                                                                                                                                             |
| HMBCS    | Hannover-Minsk Breast Cancer Study [16]                          | Belarus | Cases from the Byelorussian Institute for Oncology and Medical Radiology Aleksandrov N.N. in Minsk or at one of 5 regional oncology centers in Gomel, Mogilev, Grodno, Brest or Vitebsk (2002-2008)                                                                                          | Women attending general medical examination at gynecology clinics in Gomel, Mogilev, Grodno, Brest or Vitebsk; women attending the Institute for Inherited Diseases in Minsk; female blood donors in Minsk; healthy relatives of cases (2002-2008) |

|              |                                                                                                                          |           |                                                                                                                                                                                                                                          |                                                                                                                                                   |
|--------------|--------------------------------------------------------------------------------------------------------------------------|-----------|------------------------------------------------------------------------------------------------------------------------------------------------------------------------------------------------------------------------------------------|---------------------------------------------------------------------------------------------------------------------------------------------------|
| HUBCS        | Hannover-Ufa Breast Cancer Study [16]                                                                                    | Russia    | Consecutive cancer patients diagnosed at two participating oncological centers in Bashkortostan and Siberia between 2000-2008                                                                                                            | Healthy volunteers selected from population studies in the same geographical regions during 2002-2008.                                            |
| KBCP         | Kuopio Breast Cancer Project [17]                                                                                        | Finland   | Women seen at Kuopio University Hospital between 1990-1995 because of a breast lump, mammographic abnormality, or other breast symptom and who were found to have breast cancer                                                          | Selected from the National Population Register between 1990-1995; age and long-term area-of-residence matched to cases                            |
| kConFab/AOCS | Kathleen Cuningham Foundation Consortium for Research into Familial Breast Cancer / Australian Ovarian Cancer Study [18] | Australia | Index (youngest affected) cases from <i>BRCA1</i> - and <i>BRCA2</i> -mutation-negative multiple-case breast and breast-ovarian families recruited through family cancer clinics from across Australia and New Zealand from 1998-present | Identified from the electoral rolls from across Australia as part of the Australian Ovarian Cancer Study in 2002-2006                             |
| LMBC         | Leuven Multidisciplinary Breast Centre [19]                                                                              | Belgium   | All patients diagnosed with breast cancer and seen in the Multidisciplinary Breast Center in Leuven (Gasthuisberg) since June 2007 plus retrospective collection of cases diagnosed since 2000                                           | Blood donors at Gasthuisberg Hospital (200-2008)                                                                                                  |
| MARIE        | Mammary Carcinoma Risk Factor Investigation [20]                                                                         | Germany   | Incident and prevalent cases diagnosed in the Hamburg and Rhein-Neckar-Karlsruhe regions since 2001                                                                                                                                      | Random selection from population registries; frequency matched to cases on birth year and study region (2002-2006)                                |
| MBCSG        | Milan Breast Cancer Study Group [21]                                                                                     | Italy     | Familial and/or early onset breast cancer patients (aged 22-87) negative for mutations in <i>BRCA1</i> and <i>BRCA2</i> , ascertained at two large cancer centres in Milan from 2000-present                                             | Female blood donors recruited at two centres in Milan from 2004-present and 2007-present                                                          |
| MCBCS        | Mayo Clinic Breast Cancer Study [22]                                                                                     | U.S.A.    | Incident cases residing in 6 states (MN, WI, IA, IL, ND, SD) seen at the Mayo Clinic in Rochester, MN from 2002-2005                                                                                                                     | Women presenting for general medical examination at the Mayo Clinic from 2002-2005; frequency matched to cases on age, ethnicity and county/state |
| MCCS         | Melbourne Collaborative Cohort Study [23]                                                                                | Australia | Incident cases from the cohort of 24,469 women, diagnosed during the follow-up from baseline (1990-1994) to 2008                                                                                                                         | Random sample of the initial cohort                                                                                                               |
| NBCS         | Norwegian Breast Cancer Study [24]                                                                                       | Norway    | Incidence cases from three different hospitals: Ullevål Univ. Hospital 1990-94, Norwegian Radium Hospital 1975-1986 and 1995-1998, Haukeland Univ. Hospital                                                                              | Women residing in Tromsø and Bergen who attended the Norwegian Breast Cancer Screening Program.                                                   |

|         |                                                              |             |                                                                                                                                                                                                                                                                |                                                                                                                                                                                                           |
|---------|--------------------------------------------------------------|-------------|----------------------------------------------------------------------------------------------------------------------------------------------------------------------------------------------------------------------------------------------------------------|-----------------------------------------------------------------------------------------------------------------------------------------------------------------------------------------------------------|
| NC-BCFR | Northern California Breast Cancer Family Registry [25]       | U.S.A.      | Incident cases aged <65 years identified through the SEER cancer registry of the Greater San Francisco Bay Area from 1995-2003. All cases likely at increased genetic risk were selected; 2.5% of white cases not meeting these criteria were randomly sampled | Identified through random digit dialing conducted in the same geographic region from 1999-2000; frequency matched to cases diagnosed from 1995-1998 on 5-year age group and race/ethnicity                |
| NHS     | Nurses Health Study [26]                                     | U.S.A.      | Incident cases diagnosed before 01/07/2000 from the sub-cohort of 32,826 cohort members who gave a blood specimen in 1989-1990                                                                                                                                 | Women in this sub-cohort who were not diagnosed with breast cancer; matched to cases on age, postmenopausal status and postmenopausal hormone use.                                                        |
| OBCS    | Oulu Breast Cancer Study [27]                                | Finland     | Consecutive incident cases diagnosed at the Oulu University Hospital between 2000-2004                                                                                                                                                                         | Female blood donors recruited in 2002 from the same geographical region in Northern Finland                                                                                                               |
| OFBCR   | Ontario Familial Breast Cancer Registry [25]                 | Canada      | Invasive cases aged 20-54 years identified from the Ontario Cancer Registry from 1996-1998. All those at high genetic risk were eligible; random samples of women not meeting these criteria were also asked to participate.                                   | Identified by calling randomly selected residential telephone numbers in the same geographical region from 1998-2001; frequency matched to cases by age in 5 year categories                              |
| PBCS    | NCI Polish Breast Cancer Study [28]                          | Poland      | Incident cases identified through a rapid identification system in participating hospitals covering ~ 90% of all eligible cases, and cancer registries in Warsaw and Łódź covering 100% of all eligible cases (2000-2003)                                      | Randomly selected from population lists of all residents of Poland from 2000-2003, stratified and frequency matched to cases on city and age in 5-year categories                                         |
| RBCS    | Rotterdam Breast Cancer Study [29]                           | Netherlands | Familial breast cancer patients selected from the clinical genetics center at Erasmus Medical Center between 1994-2005                                                                                                                                         | Spouses or mutation-negative siblings of heterozygous Cystic Fibrosis mutation carriers selected from the clinical genetics center at Erasmus Medical Center between 1996-2006                            |
| SBCS    | Sheffield Breast Cancer Study [30]                           | U.K.        | Women with breast cancer recruited in 1998-2005 at surgical outpatient clinics at the Royal Hallamshire Hospital, Sheffield                                                                                                                                    | Unselected women attending the Sheffield Mammography Screening Service in 2000-2004 with no evidence of a breast lesion                                                                                   |
| SEARCH  | Study of Epidemiology & Risk Factors in Cancer Heredity [31] | U.K.        | Identified through the East Anglian Cancer Registry: (i) 1991-1996: alive, prevalent cases diagnosed before age 55; (ii) since 1996: incident cases diagnosed before age 70 diagnosed after 1996                                                               | (a) Women from the same geographic region selected from the EPIC-Norfolk cohort study, 1992-1994 (b) women attending GP practices, frequency matched to cases by age and geographic region (2003-present) |

|        |                                        |        |                                                                                                                                                                                                                            |                                                                                                                                                         |
|--------|----------------------------------------|--------|----------------------------------------------------------------------------------------------------------------------------------------------------------------------------------------------------------------------------|---------------------------------------------------------------------------------------------------------------------------------------------------------|
| SZBCS  | IHCC-Szczecin Breast Cancer Study [32] | Poland | Prospectively ascertained cases of invasive breast cancer patients diagnosed at the Regional Oncology Hospital (2002-2003 and 2006-2007) or the University Hospital (2002-2007), both in Szczecin, West Pomerania, Poland. | Selected from a population-based study of the 1.3 million inhabitants of West Pomerania (2003-2004); matched to cases for year of birth, sex and region |
| UCIBCS | UCI Breast Cancer Study [33]           | U.S.A. | All cases diagnosed in Orange County, California from 1994-1995; ascertained through the population-based Cancer Surveillance Program of Orange County California (CSPOC)                                                  | Recruited from 1998-2003 using random digit dialing among Orange County residents; frequency matched to cases by age and race/ethnicity                 |

#### STUDIES OF ASIAN WOMEN

|       |                                    |             |                                                                                                                     |                                                                                                                                                              |
|-------|------------------------------------|-------------|---------------------------------------------------------------------------------------------------------------------|--------------------------------------------------------------------------------------------------------------------------------------------------------------|
| SEBCS | Seoul Breast Cancer Study [34]     | South Korea | Consecutive, incident, cases from 2 hospitals in Seoul recruited between 2001-2005                                  | Women from same catchment area and participating in annual health check-up (2001-2005)                                                                       |
| TBCS  | IARC-Thai Breast Cancer Study [35] | Thailand    | Incident cases diagnosed at the National Cancer Institute (NCI) in Bangkok and Khon Kaen Hospital during 2002-2004. | Randomly selected women visiting hospital patients with diseases other than breast or ovarian cancer at NCI Bangkok and Khon Kaen Hospital during 2002-2004) |
| TWBCS | Taiwanese Breast Cancer Study [36] | Taiwan      | Incident cases diagnosed & treated at 2 major teaching hospitals in Taiwan between 2002-2005                        | Randomly selected women attending a health examination at same hospitals between 2002-2005                                                                   |

- 1 Dite GS, Jenkins MA, Southey MC, *et al.* Familial risks, early-onset breast cancer, and BRCA1 and BRCA2 germline mutations. *J Natl Cancer Inst* 2003;**95**:448-57.
- 2 Schmidt MK, Tollenaar RA, de Kemp SR, *et al.* Breast cancer survival and tumor characteristics in premenopausal women carrying the CHEK2\*1100delC germline mutation. *J Clin Oncol* 2007;**25**:64-9.
- 3 Schrauder M, Frank S, Strissel PL, *et al.* Single nucleotide polymorphism D1853N of the ATM gene may alter the risk for breast cancer. *J Cancer Res Clin Oncol* 2008;**134**:873-82.
- 4 Fletcher O, Johnson N, Palles C, *et al.* Inconsistent association between the STK15 F31I genetic polymorphism and breast cancer risk. *J Natl Cancer Inst* 2006;**98**:1014-8.
- 5 Colleran G, McInerney N, Rowan A, *et al.* The TGFBR1\*6A/9A polymorphism is not associated with differential risk of breast cancer. *Breast Cancer Res Treat* 2009;**119**:437-42.
- 6 Yang R, Dick M, Marme F, *et al.* Genetic variants within miR-126 and miR-335 are not associated with breast cancer risk. *Breast Cancer Res Treat* 2011;**127**:549-54.

- 7 Weischer M, Bojesen SE, Tybjaerg-Hansen A, *et al.* Increased risk of breast cancer associated with CHEK2\*1100delC. *J Clin Oncol* 2007;**25**:57-63.
- 8 Milne RL, Ribas G, Gonzalez-Neira A, *et al.* ERCC4 associated with breast cancer risk: a two-stage case-control study using high-throughput genotyping. *Cancer Res* 2006;**66**:9420-7.
- 9 Widschwendter M, Apostolidou S, Raum E, *et al.* Epigenotyping in peripheral blood cell DNA and breast cancer risk: a proof of principle study. *PLoS One* 2008;**3**:e2656.
- 10 Seal S, Thompson D, Renwick A, *et al.* Truncating mutations in the Fanconi anemia J gene BRIP1 are low-penetrance breast cancer susceptibility alleles. *Nat Genet* 2006;**38**:1239-41.
- 11 Frank B, Hemminki K, Wappenschmidt B, *et al.* Association of the CASP10 V410I variant with reduced familial breast cancer risk and interaction with the CASP8 D302H variant. *Carcinogenesis* 2006;**27**:606-9.
- 12 Pesch B, Ko Y, Brauch H, *et al.* Factors modifying the association between hormone-replacement therapy and breast cancer risk. *Eur J Epidemiol* 2005;**20**:699-711.
- 13 Justenhoven C, Pierl CB, Haas S, *et al.* The CYP1B1\_1358\_GG genotype is associated with estrogen receptor-negative breast cancer. *Breast Cancer Res Treat* 2008;**111**:171-7.
- 14 Chang-Claude J, Eby N, Kiechle M, *et al.* Breastfeeding and breast cancer risk by age 50 among women in Germany. *Cancer Causes Control* 2000;**11**:687-95.
- 15 Dork T, Bendix R, Bremer M, *et al.* Spectrum of ATM gene mutations in a hospital-based series of unselected breast cancer patients. *Cancer Res* 2001;**61**:7608-15.
- 16 Bogdanova N, Cybulski C, Bermisheva M, *et al.* A nonsense mutation (E1978X) in the ATM gene is associated with breast cancer. *Breast Cancer Res Treat* 2008;**(in press)**.
- 17 Hartikainen JM, Tuhkanen H, Kataja V, *et al.* An autosome-wide scan for linkage disequilibrium-based association in sporadic breast cancer cases in eastern Finland: three candidate regions found. *Cancer Epidemiol Biomarkers Prev* 2005;**14**:75-80.
- 18 Beesley J, Jordan SJ, Spurdle AB, *et al.* Association between single-nucleotide polymorphisms in hormone metabolism and DNA repair genes and epithelial ovarian cancer: results from two Australian studies and an additional validation set. *Cancer Epidemiol Biomarkers Prev* 2007;**16**:2557-65.
- 19 De Maeyer L, Van Limbergen E, De Nys K, *et al.* Does estrogen receptor negative/progesterone receptor positive breast carcinoma exist? *J Clin Oncol* 2008;**26**:335-6; author reply 6-8.
- 20 Flesch-Janys D, Slinger T, Mutschelknauss E, *et al.* Risk of different histological types of postmenopausal breast cancer by type and regimen of menopausal hormone therapy. *Int J Cancer* 2008;**123**:933-41.
- 21 Catucci I, Verderio P, Pizzamiglio S, *et al.* SNPs in ultraconserved elements and familial breast cancer risk. *Carcinogenesis* 2009;**30**:544-5; author reply 6.

- 22 Olson JE, Ma CX, Pelleymounter LL, *et al.* A comprehensive examination of CYP19 variation and breast density. *Cancer Epidemiol Biomarkers Prev* 2007;**16**:623-5.
- 23 Giles GG, English DR. The Melbourne Collaborative Cohort Study. *IARC Sci Publ* 2002;**156**:69-70.
- 24 Nordgard SH, Johansen FE, Alnaes GI, *et al.* Genome-wide analysis identifies 16q deletion associated with survival, molecular subtypes, mRNA expression, and germline haplotypes in breast cancer patients. *Genes Chromosomes Cancer* 2008;**47**:680-96.
- 25 John EM, Hopper JL, Beck JC, *et al.* The Breast Cancer Family Registry: an infrastructure for cooperative multinational, interdisciplinary and translational studies of the genetic epidemiology of breast cancer. *Breast Cancer Res* 2004;**6**:R375-89.
- 26 Colditz GA, Rosner BA, Chen WY, *et al.* Risk factors for breast cancer according to estrogen and progesterone receptor status. *J Natl Cancer Inst* 2004;**96**:218-28.
- 27 Erkko H, Xia B, Nikkila J, *et al.* A recurrent mutation in PALB2 in Finnish cancer families. *Nature* 2007;**446**:316-9.
- 28 Garcia-Closas M, Brinton LA, Lissowska J, *et al.* Established breast cancer risk factors by clinically important tumour characteristics. *Br J Cancer* 2006;**95**:123-9.
- 29 Easton DF, Pooley KA, Dunning AM, *et al.* Genome-wide association study identifies novel breast cancer susceptibility loci. *Nature* 2007;**447**:1087-93.
- 30 MacPherson G, Healey CS, Teare MD, *et al.* Association of a common variant of the CASP8 gene with reduced risk of breast cancer. *J Natl Cancer Inst* 2004;**96**:1866-9.
- 31 Lesueur F, Pharoah PD, Laing S, *et al.* Allelic association of the human homologue of the mouse modifier Ptpmj with breast cancer. *Hum Mol Genet* 2005;**14**:2349-56.
- 32 Jakubowska A, Jaworska K, Cybulski C, *et al.* Do BRCA1 modifiers also affect the risk of breast cancer in non-carriers? *Eur J Cancer* 2009;**45**:837-42.
- 33 Ziogas A, Gildea M, Cohen P, *et al.* Cancer risk estimates for family members of a population-based family registry for breast and ovarian cancer. *Cancer Epidemiol Biomarkers Prev* 2000;**9**:103-11.
- 34 Han S, Lee KM, Choi JY, *et al.* CASP8 polymorphisms, estrogen and progesterone receptor status, and breast cancer risk. *Breast Cancer Res Treat* 2008;**110**:387-93.
- 35 Sangrajrang S, Schmezer P, Burkholder I, *et al.* Polymorphisms in three base excision repair genes and breast cancer risk in Thai women. *Breast Cancer Res Treat* 2008;**111**:279-88.
- 36 Ding SL, Yu JC, Chen ST, *et al.* Genetic variants of BLM interact with RAD51 to increase breast cancer susceptibility. *Carcinogenesis* 2009;**30**:43-9.
