# Supplementary material
Source: PubMed Central journal article supplement (PMC4164116)
Supplement: NIHMS493090-supplement-Supplemental_Table_3.pdf [file NIHMS493090-supplement-Supplemental_Table_3.pdf]

**Supplemental Table 3. Availability of histopathology information for cases genotyped for 5p12-rs10941679 (white European women only)**

| <b>Study Acronym</b> | <b>ER</b>          | <b>PR</b>          | <b>HER2</b>        | <b>Nodes</b>       | <b>Grade</b>       | <b>Size</b>        | <b>Type</b>        |
|----------------------|--------------------|--------------------|--------------------|--------------------|--------------------|--------------------|--------------------|
| ABCFS                | 1,003 (66)         | 1,000 (69)         | -                  | 994 (41)           | -                  | -                  | -                  |
| ABCS                 | 941 (66)           | 936 (53)           | 900 (16)           | 1,408 (48)         | 1,269 (30)         | 1,047 (33)         | 1,430 (75)         |
| BBCC                 | 726 (71)           | 725 (64)           | 624 (16)           | 904 (38)           | 837 (28)           | 730 (35)           | 858 (67)           |
| BBCS                 | -                  | -                  | -                  | -                  | -                  | -                  | -                  |
| BIGGS                | 718 (75)           | 562 (76)           | -                  | 765 (48)           | 659 (40)           | 734 (57)           | 756 (81)           |
| BSUCH                | 571 (68)           | 568 (59)           | 541 (22)           | 529 (56)           | 563 (47)           | -                  | -                  |
| CGPS                 | 1,963 (83)         | 1,396 (59)         | -                  | 1,913 (52)         | 1,799 (20)         | 2,001 (43)         | 2,007 (78)         |
| CNIO-BCS             | 206 (73)           | 222 (56)           | 138 (25)           | 324 (35)           | 215 (33)           | 205 (27)           | 291 (93)           |
| ESTHER               | 416 (76)           | 410 (66)           | 191 (28)           | 430 (43)           | 460 (44)           | -                  | 448 (70)           |
| FBCS                 | -                  | -                  | -                  | -                  | -                  | -                  | -                  |
| GC-HBOC              | -                  | -                  | -                  | -                  | -                  | -                  | -                  |
| GENICA               | 960 (78)           | 958 (70)           | 675 (28)           | 933 (36)           | 928 (31)           | -                  | 901 (69)           |
| GESBC                | 416 (60)           | 409 (57)           | -                  | -                  | 453 (41)           | -                  | 505 (81)           |
| HABCS                | 702 (90)           | 631 (88)           | -                  | 844 (34)           | 767 (39)           | -                  | 828 (79)           |
| HMBCS                | -                  | -                  | -                  | -                  | -                  | -                  | -                  |
| HUBCS                | -                  | -                  | -                  | -                  | -                  | -                  | -                  |
| KBCP                 | 413 (77)           | 411 (63)           | 382 (13)           | 452 (37)           | 410 (28)           | -                  | 437 (64)           |
| kConFab/AOCS         | 228 (69)           | 203 (69)           | -                  | 127 (53)           | 287 (40)           | 349 (38)           | 437 (71)           |
| LMBC                 | 927 (82)           | 921 (74)           | 784 (18)           | 910 (42)           | 950 (45)           | 807 (51)           | 990 (85)           |
| MARIE                | 2,533 (79)         | 2,531 (66)         | 2,301 (21)         | 2,425 (21)         | 2,555 (27)         | -                  | 1,608 (67)         |
| MBCSG                | 93 (74)            | 92 (67)            | -                  | 92 (45)            | 87 (45)            | 84 (31)            | 102 (80)           |
| MCBCS                | 1,327 (84)         | 1,321 (75)         | 1009 (18)          | 745 (29)           | 1,045 (26)         | 756 (29)           | 777 (79)           |
| MCCS                 | 610 (73)           | 611 (57)           | 399 (12)           | 575 (29)           | 611 (32)           | 633 (27)           | 669 (78)           |
| NBCS                 | 294 (63)           | 294 (57)           | 182 (19)           | -                  | 171 (26)           | -                  | -                  |
| NC-BCFR              | 236 (85)           | 235 (73)           | -                  | 143 (34)           | 223 (25)           | 220 (28)           | 252 (79)           |
| NHS                  | 817 (80)           | 797 (69)           | -                  | 928 (24)           | -                  | -                  | 921 (81)           |
| OBCS                 | 535 (80)           | 534 (70)           | 535 (14)           | 532 (45)           | 516 (38)           | 532 (39)           | 535 (77)           |
| OFBCR                | 894 (71)           | 876 (61)           | -                  | 861 (33)           | 892 (33)           | 900 (27)           | 909 (87)           |
| PBCS                 | 1,666 (66)         | 1,663 (52)         | 1,192 (11)         | 1,653 (39)         | 1,665 (27)         | 1,648 (44)         | 1,835 (61)         |
| RBCS                 | 526 (76)           | 437 (66)           | -                  | 656 (43)           | 486 (51)           | 576 (39)           | 710 (63)           |
| SBCS                 | 695 (76)           | 327 (61)           | 348 (9)            | 974 (28)           | 974 (32)           | 896 (38)           | 1,031 (76)         |
| SEARCH               | 4,369 (81)         | 2,577 (66)         | 1,857 (12)         | 4,807 (36)         | 5,566 (28)         | 4,958 (34)         | 6,459 (74)         |
| SZBCS                | 796 (71)           | -                  | -                  | 533 (48)           | -                  | 634 (34)           | 847 (63)           |
| UCIBCS               | 664 (79)           | 654 (70)           | -                  | 871 (28)           | 650 (36)           | 784 (30)           | 911 (70)           |
| <b>Total</b>         | <b>26,245 (75)</b> | <b>22,301 (65)</b> | <b>12,058 (18)</b> | <b>26,328 (39)</b> | <b>25,038 (34)</b> | <b>18,494 (36)</b> | <b>27,454 (75)</b> |

ER, estrogen receptor status known (% positive); PR, progesteron receptor status known (% positive); HER2, human epidermal growth factor receptor 2 status known (% positive); Nodes, axillary nodal affectation known (% positive); Grade, tumour grade known (% grade 3); Size, tumour size known (% >20m); Type, tumour morphology known (% ductal).
