# Supplementary material
Source: PubMed Central journal article supplement (PMC4164116)
Supplement: NIHMS493090-supplement-Supplemental_Table_4.pdf [file NIHMS493090-supplement-Supplemental_Table_4.pdf]

**Supplemental Table 4. Genotype counts for SNPs in 5p12, by participating study**

| Study        | rs10941679 |       |     |          |       |     | rs981782 |       |     |          |       |       |
|--------------|------------|-------|-----|----------|-------|-----|----------|-------|-----|----------|-------|-------|
|              | Cases      |       |     | Controls |       |     | Cases    |       |     | Controls |       |       |
|              | AA         | AG    | GG  | AA       | AG    | GG  | TT       | TG    | GG  | TT       | TG    | GG    |
| ABCFS        | 627        | 475   | 77  | 235      | 151   | 29  |          |       |     |          |       |       |
| ABCS         | 718        | 601   | 111 | 291      | 213   | 44  |          |       |     |          |       |       |
| BBCC         | 477        | 405   | 80  | 470      | 290   | 51  |          |       |     |          |       |       |
| BBCS         | 566        | 486   | 92  | 455      | 330   | 43  |          |       |     |          |       |       |
| BIGGS        | 499        | 376   | 70  | 485      | 344   | 67  |          |       |     |          |       |       |
| BSUCH        | 316        | 246   | 44  | 487      | 307   | 43  | 168      | 312   | 126 | 215      | 425   | 196   |
| CGPS         | 1,140      | 905   | 173 | 3,659    | 2,516 | 461 |          |       |     |          |       |       |
| CNIO-BCS     | 406        | 252   | 44  | 512      | 263   | 33  |          |       |     |          |       |       |
| ESTHER       | 263        | 190   | 31  | 288      | 189   | 23  | 145      | 242   | 95  | 129      | 264   | 102   |
| FBCS         | 796        | 597   | 123 | 499      | 293   | 66  |          |       |     |          |       |       |
| GC-HBOC      | 445        | 340   | 68  | 647      | 464   | 100 |          |       |     |          |       |       |
| GENICA       | 560        | 383   | 67  | 572      | 368   | 72  |          |       |     |          |       |       |
| GESBC        | 282        | 179   | 52  | 289      | 224   | 38  |          |       |     |          |       |       |
| HABCS        | 545        | 418   | 70  | 531      | 417   | 50  |          |       |     |          |       |       |
| HMBCS        | 897        | 735   | 131 | 531      | 417   | 67  |          |       |     |          |       |       |
| HUBCS        | 345        | 313   | 69  | 508      | 403   | 75  |          |       |     |          |       |       |
| KBCP         | 213        | 208   | 39  | 229      | 170   | 25  |          |       |     |          |       |       |
| kConFab/AOCS | 248        | 208   | 33  | 435      | 312   | 57  | 75       | 121   | 41  | 62       | 94    | 34    |
| LMBC         | 608        | 439   | 78  | 405      | 305   | 49  | 369      | 530   | 233 | 232      | 370   | 157   |
| MARIE        | 1,384      | 1,015 | 177 | 2,935    | 2,039 | 325 | 805      | 1,259 | 510 | 1,556    | 2,648 | 1,094 |
| MBCSG        | 382        | 282   | 49  | 742      | 418   | 61  |          |       |     |          |       |       |
| MCBCS        | 763        | 628   | 100 | 844      | 596   | 107 |          |       |     |          |       |       |
| MCCS         | 337        | 281   | 51  | 404      | 288   | 55  |          |       |     |          |       |       |
| NBCS         | 722        | 636   | 107 | 879      | 724   | 134 |          |       |     |          |       |       |
| NC-BCFR      | 151        | 92    | 23  | 91       | 57    | 6   |          |       |     |          |       |       |
| NHS          | 488        | 374   | 82  | 881      | 587   | 93  |          |       |     |          |       |       |
| OBCS         | 272        | 206   | 57  | 294      | 185   | 28  |          |       |     |          |       |       |
| OFBCR        | 633        | 435   | 74  | 189      | 122   | 16  |          |       |     |          |       |       |
| PBCS         | 944        | 760   | 132 | 1,221    | 858   | 148 |          |       |     |          |       |       |
| RBCS         | 340        | 314   | 56  | 458      | 280   | 57  |          |       |     |          |       |       |
| SBCS         | 604        | 440   | 80  | 641      | 451   | 94  |          |       |     |          |       |       |
| SEARCH       | 3,334      | 2,717 | 484 | 3,751    | 2,589 | 437 | 474      | 1,140 | 654 | 502      | 1,109 | 656   |
| SZBCS        | 465        | 352   | 78  | 478      | 325   | 56  |          |       |     |          |       |       |
| UCIBCS       | 471        | 383   | 58  | 286      | 173   | 34  | 274      | 444   | 196 | 149      | 252   | 94    |
| SEBCS        | 467        | 790   | 417 | 307      | 557   | 264 |          |       |     |          |       |       |
| TBCS         | 113        | 226   | 97  | 81       | 135   | 67  |          |       |     |          |       |       |
| TWBCS        | 185        | 444   | 268 | 224      | 463   | 239 |          |       |     |          |       |       |
